## Correction

## Correction for: The regulation of p53 by phosphorylation: a model for how distinct signals Integrate into the p53 pathway

Nicola J. MacLaine<sup>1</sup>, Ted R. Hupp<sup>1</sup>

<sup>1</sup>University of Edinburgh, Institute of Genetics and Molecular Medicine, CRUK p53 Signal Transduction Laboratories, Edinburgh EH4 2XR, Scotland, UK

**Correspondence to:** Ted R. Hupp; email: [ted.hupp@ed.ac.uk](mailto:ted.hupp@ed.ac.uk)

**Keywords:** p53, ATM, AMPK, CK1, Ser20 phosphorylation, kinase, stress

**Original article:** *Aging (Albany NY)* 2009; 1: 490-502

PMID: [20157532](https://pubmed.ncbi.nlm.nih.gov/20157532/)

PMCID: [PMC2806026](https://pubmed.ncbi.nlm.nih.gov/PMC2806026/)

doi: [10.18632/aging.100047](https://doi.org/10.18632/aging.100047)

**This article has been corrected:** The authors would like to clarify the reuse of the earlier published Western Blot images in Figure 5A. They stated: “The immunoblot data in Figure 5A was re-used from the immunoblot data in the original source article (Figure 11A) [1]. The text of the article stated that these data in Figure 5A was reported previously with reference to the source article [1]. We would now like to clarify that the immunoblot data can be re-used under the terms of the [Creative Commons Attribution License \(CC BY\)](https://creativecommons.org/licenses/by/4.0/). We write this clarification to indicate that the data in Figure 5A are accurate and that this amendment does not alter the content or conclusion of this article”.

### REFERENCE

1. MacLaine NJ, Oster B, Bundgaard B, Fraser JA, Buckner C, Lazo PA, Meek DW, Höllsberg P, Hupp TR. A central role for CK1 in catalyzing phosphorylation of the p53 transactivation domain at serine 20 after HHV-6B viral infection. *J Biol Chem.* 2008; 283:28563–73.  
<https://doi.org/10.1074/jbc.M804433200>  
PMID:[18669630](https://pubmed.ncbi.nlm.nih.gov/18669630/)
